# Supplementary material for: Comparative Transcriptomic Analysis of Head in Laodelphax striatellus upon Rice Stripe Virus Infection
Source: MDPI journal article supplement (doi:10.3390/agronomy12123202), 2022-12-16
Supplement: s1 [file s1]

**Table S1.** Primers used for qRT-PCR.

| Primer name      | Primer Sequence (5'-3') |
|------------------|-------------------------|
| EH-F             | ATGTTGTTGGCTGGTCTGCT    |
| EH-R             | GCAGCAGTTTTCCCTTGAAC    |
| FMRFaR-F         | ACCGAGGTGGAAACAAACTG    |
| FMRFaR-R         | CGCTGCATTGATGGCTACTA    |
| Mth2-F           | CGGTGTACCATTGCTGATTG    |
| Mth2-R           | TGCCGTTGCTGAGAACATTA    |
| CYP6FL1-F        | TCAGCAAAAACCTGCAGGATG   |
| CYP6FL1-R        | AAGAATTCGGGATCGTTGTG    |
| CYP314A1-F       | CACCGAAGTCACAGCACACT    |
| CYP314A1-R       | CAGCTCCTCGAAATGTGTGA    |
| CYP4C62-F        | CTCAAATCAACGCCCAGAAT    |
| CYP4C62-R        | ATCGTCAAGGTTCTGTGGTTC   |
| ST29-F           | ATAGCCATGACCCTGATTGC    |
| ST29-R           | CTGAGGCTTTAGCCTTGGTG    |
| ST42-F           | CTCTCAGCTCGGACGAAATC    |
| ST42-R           | AACAACAGCTCCCACTCCAC    |
| ST27-F           | ATGGGTTGTGGCTCTTATGG    |
| ST27-R           | CAGGTACATGGGCACAACTG    |
| HR38-F           | ACAGAGGCGGAGAAAATTCA    |
| HR38-R           | AGCCGCAGTACGAAGAGTTC    |
| ATG13-F          | ATGGTAGACTTGCGGACACC    |
| ATG13-R          | CAGTTCAGCTGTTTGGTGA     |
| E3-F             | CGTTGGCCTAAAGGTTTTCA    |
| E3-R             | TCAAATTCGGCCAATTCTTC    |
| E74A-F           | CCGACGACTTCTACCTGCTC    |
| E74A-R           | CAGCAGGAATTCCCACAGAT    |
| PLRP2-F          | CTTTTCACACGGTGCAGAGA    |
| PLRP2-R          | TTGAAGACGTTGAGGGGTTC    |
| U60S-F           | ACGTTGAGGAGAGCACGAGT    |
| U60S-R           | GAGGGTTGGCTCAATGACAC    |
| Dsx-F            | GAGCAGCACAATCAGTTCCA    |
| Dsx-R            | GCCACATACTCCGACTCCAT    |
| $\beta$ -actin-F | GCGAGAAATCGTCCGAGACAT   |
| $\beta$ -actin-R | AACTGGAGGAGGCGGCTGT     |
